# Supplementary material for: Relationship between the Red Blood Cell Distribution Width-to-Albumin Ratio and the Risk of Chest Pain and Mortality among U.S. Adults: Evidence from the NHANES 2007–2016
Source: Research Square preprint supplement (doi:10.21203/rs.3.rs-6972414/v1), 2025-08-08
Supplement: Supplementary file 1 [file 12a43c250b61c1aabb48967d.xlsx]

## Sheet: Sheet
Characteristic	model 1				model 2				model 3
	HR1	95% CI1	p-value		HR1	95% CI1	p-value		HR1	95% CI1	p-value
ALL participants
Continous	2.58	2.22，2.99	<0.001		2.5	2.18，2.87	<0.001		2.28	1.99，2.60	<0.001
RAR
Q1	-	-			-	-			-	-
Q2	1.6	1.25,2.05	<0.001		1.22	0.97,1.55	0.094		1.23	0.97,1.56	0.085
Q3	2.08	1.67,2.58	<0.001		1.22	1.00,1.48	0.052		1.18	0.98,1.43	0.078
Q4	4.65	3.73,5.79	<0.001		2.22	1.77,2.79	<0.001		2.07	1.68,2.55	<0.001
P for trend			<0.001				<0.001				<0.001
Chestpain
Continous	2.79	2.17,3.59	<0.001		3	2.18,4.13	<0.001		2.87	2.17,3.80	<0.001
RAR
Q1	-	-			-	-			-	-
Q2	1.57	1.01,2.43	0.046		1.22	0.77,1.93	0.405		1.11	0.70,1.77	0.653
Q3	1.97	1.28,3.01	0.002		1.08	0.70,1.66	0.723		0.94	0.62,1.42	0.761
Q4	4.58	2.97,7.09	<0.001		2.43	1.51,3.92	<0.001		2.05	1.30,3.24	0.002
P for trend			<0.001				<0.001				0.005
Non-chestpain
Continous	2.5	2.10,2.97	<0.001		2.3	1.98,2.68	<0.001		2.02	1.70,2.41	<0.001
RAR
Q1	-	-			-	-			-	-
Q2	1.61	1.24,2.08	<0.001		1.22	0.95,1.57	0.119		1.24	0.96,1.59	0.096
Q3	2.11	1.66,2.68	<0.001		1.26	1.01,1.57	0.045		1.28	1.03,1.59	0.027
Q4	4.63	3.69,5.81	<0.001		2.14	1.68,2.74	<0.001		2.05	1.63,2.59	<0.001
P for trend			<0.001				<0.001				<0.001
HR,Hazard Ratio;CI,Confidence Interval
Model 1: Unadjusted
Model 2: Age,gender,race,education,marital,PIR were adjusted;
Model 3: Age,gender,race,education,marital,PIR,BMI,HbA1c,TC,HDL-C,smoking,drinking,BUN, UA,serum creatinine,AST,ALT,diabetes,hypertension,cancer,CHD,angina and stroke were adjusted.
