# Supplementary material for: Relationship between the Red Blood Cell Distribution Width-to-Albumin Ratio and the Risk of Chest Pain and Mortality among U.S. Adults: Evidence from the NHANES 2007–2016
Source: Research Square preprint supplement (doi:10.21203/rs.3.rs-6972414/v1), 2025-08-08
Supplement: Supplementary file 2 [file 6f8920c5eb4e0f52e72c17fb.docx]

| **Characteristic** | **N**1 | **Overall**  N = 99,610,0592 | **No pain**  N = 75,477,6052 | **Pain**  N = 24,132,4542 | **p-value**3 |
| --- | --- | --- | --- | --- | --- |
| Age (years) | 12,256 | 57.5± (11.6) | 57.4± (11.6) | 57.8± (11.4) | 0.15 |
| Sex | 12,256 |  |  |  | 0.6 |
| female |  | 6,137 (51%) | 4,611 (51%) | 1,526 (51%) |  |
| male |  | 6,119 (49%) | 4,641 (49%) | 1,478 (49%) |  |
| Race | 12,256 |  |  |  | 0.10 |
| Non-Hispanic White |  | 5,790 (75%) | 4,250 (75%) | 1,540 (76%) |  |
| Non-Hispanic Black |  | 2,281 (8.5%) | 1,706 (8.4%) | 575 (9.1%) |  |
| Mexican American |  | 1,767 (6.1%) | 1,392 (6.4%) | 375 (5.1%) |  |
| Other Hispanic |  | 1,312 (4.3%) | 1,020 (4.4%) | 292 (3.9%) |  |
| Other Race - Including Multi-Racial |  | 1,106 (6.0%) | 884 (6.0%) | 222 (6.0%) |  |
| Education level | 12,256 |  |  |  | <0.001 |
| Some College or AA degree |  | 3,310 (30%) | 2,460 (29%) | 850 (31%) |  |
| College Graduate or above |  | 2,923 (31%) | 2,312 (33%) | 611 (27%) |  |
| High School Grad/GED |  | 2,803 (23%) | 2,088 (22%) | 715 (25%) |  |
| 9-11th Grade |  | 1,704 (10%) | 1,256 (10%) | 448 (11%) |  |
| Less Than 9th Grade |  | 1,516 (5.8%) | 1,136 (5.6%) | 380 (6.3%) |  |
| Marital status | 12,256 |  |  |  | 0.001 |
| Married |  | 7,214 (65%) | 5,603 (66%) | 1,611 (61%) |  |
| Unmarried and others |  | 5,042 (35%) | 3,649 (34%) | 1,393 (39%) |  |
| PIR | 12,256 |  |  |  | <0.001 |
| <1.5 |  | 4,171.00 (20.58%) | 2,971.00 (19.09%) | 1,200.00 (25.23%) |  |
| 1.5-3.5 |  | 3,950.00 (30.83%) | 2,983.00 (30.05%) | 967.00 (33.25%) |  |
| >=3.5 |  | 4,135.00 (48.59%) | 3,298.00 (50.85%) | 837.00 (41.52%) |  |
| BMI,kg/m^2 | 12,256 |  |  |  | <0.001 |
| <25 |  | 3,088 (26%) | 2,404 (27%) | 684 (23%) |  |
| 25-30 |  | 4,720 (39%) | 3,608 (39%) | 1,112 (37%) |  |
| >=30 |  | 4,448 (35%) | 3,240 (34%) | 1,208 (39%) |  |
| Smoking | 12,256 | 5,966 (48%) | 4,282 (46%) | 1,684 (56%) | <0.001 |
| Drinking | 12,256 | 8,619 (77%) | 6,443 (77%) | 2,176 (78%) | 0.2 |
| Hypertension | 12,256 | 5,644 (41%) | 3,913 (38%) | 1,731 (52%) | <0.001 |
| Diabetes | 12,256 |  |  |  | <0.001 |
| Yes |  | 1,902 (11%) | 1,300 (10%) | 602 (15%) |  |
| No |  | 9,992 (86%) | 7,694 (87%) | 2,298 (82%) |  |
| Borderline |  | 362 (2.9%) | 258 (2.8%) | 104 (3.1%) |  |
| HbA1c, % | 12,256 | 5.76± (0.94) | 5.73± (0.92) | 5.83± (1.03) | <0.001 |
| TC, mg/dL | 12,256 | 203± (40) | 204± (40) | 203± (42) | 0.2 |
| HDL, mg/dL | 12,256 | 54± (15) | 55± (16) | 52± (15) | <0.001 |
| Non_HDL, mg/dL | 12,256 | 149± (41) | 149± (41) | 150± (43) | 0.7 |
| ALT, U/L | 12,256 | 25± (16) | 25± (16) | 26± (17) | 0.073 |
| AST, U/L | 12,256 | 26± (15) | 26± (13) | 26± (19) | 0.6 |
| BUN, mg/dl | 12,256 | 14.5± (5.5) | 14.5± (5.5) | 14.5± (5.5) | >0.9 |
| UA, mg/dl | 12,256 | 5.47± (1.38) | 5.46± (1.38) | 5.51± (1.38) | 0.2 |
| Serum creatinine, mg/dl | 12,256 | 0.91± (0.37) | 0.91± (0.36) | 0.92± (0.39) | 0.4 |
| eGFR,ml/min/1.73m^2 | 12,256 | 85± (19) | 86± (19) | 85± (19) | 0.3 |
| RDW，% | 12,256 | 13.19± (1.17) | 13.14± (1.13) | 13.33± (1.28) | <0.001 |
| ALB, g/L | 12,256 | 4.28± (0.30) | 4.28± (0.29) | 4.26± (0.31) | 0.003 |
| Cancer | 12,256 | 1,621 (15%) | 1,152 (14%) | 469 (18%) | <0.001 |
| CHD | 12,256 | 665 (4.6%) | 244 (2.3%) | 421 (12%) | <0.001 |
| Angina | 12,256 | 391 (2.8%) | 88 (0.8%) | 303 (8.8%) | <0.001 |
| Stroke | 12,256 | 590 (3.6%) | 350 (2.7%) | 240 (6.3%) | <0.001 |
| RAR | 12,256 | 3.10± (0.39) | 3.09± (0.38) | 3.15± (0.44) | <0.001 |
| RAR quantile | 12,256 |  |  |  | <0.001 |
| Q1 |  | 2,481 (25%) | 1,941 (26%) | 540 (22%) |  |
| Q2 |  | 2,791 (25%) | 2,172 (26%) | 619 (23%) |  |
| Q3 |  | 3,193 (25%) | 2,428 (25%) | 765 (25%) |  |
| Q4 |  | 3,791 (25%) | 2,711 (23%) | 1,080 (30%) |  |
| 1N not Missing (unweighted) | | | | | |
| 2Mean± (SD); n (unweighted) (%) | | | | | |
| 3Design-based KruskalWallis test; Pearson's X^2: Rao & Scott adjustment | | | | | |
| **Notes**:PIR: poverty income ratio; HbA1C: hemoglobin type A1C; CHD: coronary heart disease; BMI: body mass index; TC: total cholesterol; HDL-C:high-density lipoprotein cholesterol; Non-HDL: non-high-density lipoprotein cholesterol; ALT: alanine aminotransferase; AST: aspartate aminotransferase; BUN: blood Urea nitrogen; UA: uric acid; eGFR: estimated glomerular filtration rate; RDW: red cell distribution width; ALB: albumin; RAR: red blood cell distribution width-to-albumin ratio. | | | | | |
