# Supplementary material for: Relationship between the Red Blood Cell Distribution Width-to-Albumin Ratio and the Risk of Chest Pain and Mortality among U.S. Adults: Evidence from the NHANES 2007–2016
Source: Research Square preprint supplement (doi:10.21203/rs.3.rs-6972414/v1), 2025-08-08
Supplement: Supplementary file 3 [file cea77e3ab03f45fd984d069a.xlsx]

## Sheet: Sheet
table 2 ORs (95% CIs) for chest pain according to the RAR
Characteristic	model 1			model 2			model 3
	OR1	95% CI1	p-value	OR1	95% CI1	p-value	OR1	95% CI1	p-value
ALL participants
Continous	1.51	1.30，1.75	<0.001	1.46	1.24，1.72	<0.001	1.29	1.07，1.56	0.009
RAR
Q1	-	-		-	-		-	-
Q2	1.02	0.88，1.19	0.8	1.02	0.87, 1.19	0.8	1.03	0.87, 1.20	0.8
Q3	1.15	0.97，1.35	0.1	1.12	0.95, 1.32	0.2	1.04	0.87, 1.24	0.7
Q4	1.49	1.26, 1.78	<0.001	1.43	1.18, 1.73	<0.001	1.27	1.01, 1.60	0.038
P for trend			<0.001			0.0006			0.0534
OR,Odds Ratio;CI,Confidence Interval
Model 1: Unadjusted;
Model 2: Age,gender,race,education,marital,PIR were adjusted;
Model 3: Age,gender,race,education,PIR,BMI,HbA1c,TC,HDL-C,smoking,drinking,BUN, UA,serum creatinine,AST,ALT,diabetes,hypertension,cancer,CHD,angina and stroke were adjusted.
